# Supplementary material for: TGF-β1 and TGFβR2 Gene Polymorphisms in Patients with Unstable Angina
Source: MDPI journal article supplement (doi:10.3390/biomedicines11010155), 2023-01-07
Supplement: s1 [file s1]

## Supplementary Tables

**Supplementary Table S1.** Distribution of *TGFB1* rs1800469, rs1800470, *TGFB2* rs6785358, rs9838682 genotypes and alleles in with unstable angina and controls in < 55 years group.

|                         | <u>Control</u>               |        | <u>Unstable</u>               |        | <i>p</i> value^ | <u>Compared</u><br><u>genotypes</u><br><u>or alleles</u> | <i>p</i> value <sup>‡</sup> | OR (95% CI)      |
|-------------------------|------------------------------|--------|-------------------------------|--------|-----------------|----------------------------------------------------------|-----------------------------|------------------|
|                         | <u>group (<i>n</i> = 15)</u> |        | <u>angina (<i>n</i> = 55)</u> |        |                 |                                                          |                             |                  |
|                         | <i>n</i>                     | %      | <i>n</i>                      | %      |                 |                                                          |                             |                  |
| <i>TGFB1 rs1800469</i>  |                              |        |                               |        |                 |                                                          |                             |                  |
| genotype                |                              |        |                               |        |                 |                                                          |                             |                  |
| GG                      | 7                            | 46.67% | 15                            | 27.27% | 0.254           | AA+GA vs GG                                              | 0.21                        | 2.33 (0.72–7.56) |
| GA                      | 6                            | 40.00% | 35                            | 63.64% |                 | AA vs GA+GG                                              | 0.64                        | 0.65 (0.11–3.74) |
| AA                      | 2                            | 13.33% | 5                             | 9.09%  |                 | AA vs GG                                                 | 1.00                        | 1.17 (0.18–7.56) |
|                         |                              |        |                               |        |                 | GA vs GG                                                 | 0.19                        | 2.72 (0.78–9.47) |
|                         |                              |        |                               |        |                 | AA vs GA                                                 | 0.33                        | 0.43 (0.07–2.74) |
| Allele                  |                              |        |                               |        |                 |                                                          |                             |                  |
| G                       | 20                           | 66.67% | 65                            | 59.09% | A vs G          | 0.53                                                     | 1.39 (0.59–3.24)            |                  |
| A                       | 10                           | 33.33% | 45                            | 40.91% |                 |                                                          |                             |                  |
| <i>TGFB1 rs1800470</i>  |                              |        |                               |        |                 |                                                          |                             |                  |
| genotype                |                              |        |                               |        |                 |                                                          |                             |                  |
| GG                      | 2                            | 13.33% | 9                             | 16.36% | 0.450           | AA+GA vs GG                                              | 1.00                        | 0.79 (0.15–4.10) |
| GA                      | 7                            | 46.67% | 33                            | 60.00% |                 | AA vs GA+GG                                              | 0.33                        | 0.46 (0.14–1.55) |
| AA                      | 6                            | 40.00% | 13                            | 23.64% |                 | AA vs GG                                                 | 0.67                        | 0.48 (0.08–2.95) |
|                         |                              |        |                               |        |                 | GA vs GG                                                 | 1.00                        | 1.05 (0.19–5.94) |
|                         |                              |        |                               |        |                 | AA vs GA                                                 | 0.31                        | 0.46 (0.13–1.63) |
| Allele                  |                              |        |                               |        |                 |                                                          |                             |                  |
| G                       | 11                           | 36.67% | 51                            | 46.36% | A vs G          | 0.41                                                     | 0.67 (0.29–1.54)            |                  |
| A                       | 19                           | 63.33% | 59                            | 53.64% |                 |                                                          |                             |                  |
| <i>TGFBR2 rs6785358</i> |                              |        |                               |        |                 |                                                          |                             |                  |
| genotype                |                              |        |                               |        |                 |                                                          |                             |                  |
| AA                      | 11                           | 73.33% | 41                            | 74.54% | 0.594           | GG+AG vs AA                                              | 1.00                        | 0.94 (0.26–3.43) |
| AG                      | 3                            | 20.00% | 13                            | 23.64% |                 | GG vs AG+AA                                              | 0.39                        | 0.26 (0.02–4.41) |
| GG                      | 1                            | 6.67%  | 1                             | 1.82%  |                 | GG vs AA                                                 | 0.40                        | 0.27 (0.02–4.64) |
|                         |                              |        |                               |        |                 | AG vs AA                                                 | 1.00                        | 1.16 (0.28–4.81) |
|                         |                              |        |                               |        |                 | GG vs AG                                                 | 0.41                        | 0.23 (0.01–4.84) |
| Allele                  |                              |        |                               |        |                 |                                                          |                             |                  |
| A                       | 25                           | 83.33% | 95                            | 86.36% | G vs A          | 0.77                                                     | 0.79 (0.26–2.38)            |                  |
| G                       | 5                            | 16.67% | 15                            | 13.64% |                 |                                                          |                             |                  |
| <i>TGFBR2 rs9838682</i> |                              |        |                               |        |                 |                                                          |                             |                  |
| genotype                |                              |        |                               |        |                 |                                                          |                             |                  |
| AA                      | 2                            | 13.33% | 4                             | 7.27%  | 0.386           | AA+AG vs GG                                              | 0.39                        | 1.71 (0.54–5.41) |
| AG                      | 5                            | 33.33% | 29                            | 52.73% |                 | AA vs AG+GG                                              | 0.60                        | 0.51 (0.08–3.10) |
| GG                      | 8                            | 53.34% | 22                            | 40.00% |                 | AA vs GG                                                 | 1.00                        | 0.73 (0.11–4.77) |
|                         |                              |        |                               |        |                 | AG vs GG                                                 | 0.35                        | 2.11 (0.61–7.34) |
|                         |                              |        |                               |        |                 | AA vs AG                                                 | 0.28                        | 0.35 (0.05–2.41) |
| Allele                  |                              |        |                               |        |                 |                                                          |                             |                  |
| A                       | 9                            | 30.00% | 37                            | 33.64% |                 |                                                          |                             |                  |

|   |    |        |    |        |        |      |                  |
|---|----|--------|----|--------|--------|------|------------------|
| G | 21 | 70.00% | 73 | 66.36% | A vs G | 0.83 | 1.18 (0.49–2.84) |
|---|----|--------|----|--------|--------|------|------------------|

^  $\chi^2$  test. # Fisher's Exact Test.

**Supplementary Table S2.** Distribution of *TGFB1* rs1800469, rs1800470, *TGFBR2* rs6785358, rs9838682 genotypes and alleles in with unstable angina and controls in  $\geq 55$  years group.

|                         | <u>Control</u><br><u>group (n = 129)</u> |        | <u>Unstable</u><br><u>angina (n = 177)</u> |        | <i>p</i> value <sup>^</sup> | <u>Compared</u><br><u>genotypes</u><br><u>or alleles</u> | <i>p</i> value <sup>#</sup> | OR (95% CI)       |
|-------------------------|------------------------------------------|--------|--------------------------------------------|--------|-----------------------------|----------------------------------------------------------|-----------------------------|-------------------|
|                         | <i>n</i>                                 | %      | <i>n</i>                                   | %      |                             |                                                          |                             |                   |
| <i>TGFB1 rs1800469</i>  |                                          |        |                                            |        |                             |                                                          |                             |                   |
| genotype                |                                          |        |                                            |        |                             |                                                          |                             |                   |
| GG                      | 55                                       | 42.64% | 71                                         | 40.11% | 0.907                       | AA+GA vs GG                                              | 0.72                        | 1.11 (0.70–1.76)  |
| GA                      | 58                                       | 44.96% | 83                                         | 46.89% |                             | AA vs GA+GG                                              | 1.00                        | 1.06 (0.53–2.09)  |
| AA                      | 16                                       | 12.40% | 23                                         | 13.00% |                             | AA vs GG                                                 | 0.85                        | 1.11 (0.54–2.31)  |
|                         |                                          |        |                                            |        |                             | GA vs GG                                                 | 0.71                        | 1.11 (0.68–1.80)  |
|                         |                                          |        |                                            |        |                             | AA vs GA                                                 | 1.00                        | 1.01 (0.49–2.07)  |
| Allele                  |                                          |        |                                            |        |                             |                                                          |                             |                   |
| G                       | 168                                      | 65.12% | 225                                        | 63.56% |                             | A vs G                                                   | 0.73                        | 1.07 (0.77–1.50)  |
| A                       | 90                                       | 34.88% | 129                                        | 36.44% |                             |                                                          |                             |                   |
| <i>TGFB1 rs1800470</i>  |                                          |        |                                            |        |                             |                                                          |                             |                   |
| genotype                |                                          |        |                                            |        |                             |                                                          |                             |                   |
| GG                      | 22                                       | 17.05% | 39                                         | 22.03% | 0.468                       | GG+GA vs AA                                              | 0.90                        | 0.96 (0.60–1.55)  |
| GA                      | 63                                       | 48.84% | 76                                         | 42.94% |                             | GG vs GA+AA                                              | 0.31                        | 1.38 (0.77–2.46)  |
| AA                      | 44                                       | 34.11% | 62                                         | 35.03% |                             | GG vs AA                                                 | 0.52                        | 1.26 (0.66–2.41)  |
|                         |                                          |        |                                            |        |                             | GA vs AA                                                 | 0.60                        | 0.86 (0.51–1.43)  |
|                         |                                          |        |                                            |        |                             | GG vs GA                                                 | 0.28                        | 1.47 (0.79–2.73)  |
| Allele                  |                                          |        |                                            |        |                             |                                                          |                             |                   |
| G                       | 107                                      | 41.47% | 154                                        | 43.50% |                             | G vs A                                                   | 0.62                        | 1.09 (0.79–1.50)  |
| A                       | 151                                      | 58.53% | 200                                        | 56.50% |                             |                                                          |                             |                   |
| <i>TGFBR2 rs6785358</i> |                                          |        |                                            |        |                             |                                                          |                             |                   |
| genotype                |                                          |        |                                            |        |                             |                                                          |                             |                   |
| AA                      | 86                                       | 66.67% | 132                                        | 74.58% | 0.081                       | GG+AG vs AA                                              | 0.16                        | 0.68 (0.41–1.12)  |
| AG                      | 42                                       | 32.56% | 40                                         | 22.60% |                             | GG vs AG+AA                                              | 0.41                        | 3.72 (0.43–32.24) |
| GG                      | 1                                        | 0.77%  | 5                                          | 2.82%  |                             | GG vs AA                                                 | 0.41                        | 3.26 (0.37–28.37) |
|                         |                                          |        |                                            |        |                             | AG vs AA                                                 | 0.07                        | 0.62 (0.37–1.03)  |
|                         |                                          |        |                                            |        |                             | GG vs AG                                                 | 0.20                        | 5.25 (0.59–46.92) |
| Allele                  |                                          |        |                                            |        |                             |                                                          |                             |                   |
| A                       | 214                                      | 82.95% | 304                                        | 85.88% |                             | G vs A                                                   | 0.36                        | 0.80 (0.51–1.24)  |
| G                       | 44                                       | 17.05% | 50                                         | 14.12% |                             |                                                          |                             |                   |
| <i>TGFBR2 rs9838682</i> |                                          |        |                                            |        |                             |                                                          |                             |                   |
| genotype                |                                          |        |                                            |        |                             |                                                          |                             |                   |
| AA                      | 18                                       | 13.95% | 20                                         | 11.30% | 0.363                       | AA+AG vs GG                                              | 0.20                        | 0.72 (0.45–1.14)  |
| AG                      | 63                                       | 48.84% | 77                                         | 43.50% |                             | AA vs AG+GG                                              | 0.49                        | 0.79 (0.40–1.55)  |
| GG                      | 48                                       | 37.21% | 80                                         | 45.20% |                             | AA vs GG                                                 | 0.35                        | 0.67 (0.32–1.38)  |
|                         |                                          |        |                                            |        |                             | AG vs GG                                                 | 0.22                        | 0.73 (0.45–1.20)  |
|                         |                                          |        |                                            |        |                             | AA vs AG                                                 | 0.86                        | 0.91 (0.44–1.87)  |
| Allele                  |                                          |        |                                            |        |                             |                                                          |                             |                   |
| A                       | 99                                       | 38.37% | 117                                        | 33.05% |                             | A vs G                                                   | 0.20                        | 0.79 (0.57–1.11)  |
| G                       | 159                                      | 61.63% | 237                                        | 66.95% |                             |                                                          |                             |                   |

^  $\chi^2$  test. # Fisher's Exact Test.

**Supplementary Table S3.** Distributions of the *TGFB1* rs1800469, rs1800470, *TGFBR2* rs6785358, rs9838682 genotypes and alleles in unstable angina patients with and without diabetes mellitus (DM).

| Without Diabetes Mellitus ( <i>n</i> = 175) |     |          | Diabetes Mellitus ( <i>n</i> = 57) |        | <i>p</i> -value ^ | Compared genotypes or alleles | <i>p</i> -value * | OR (95% CI)      |
|---------------------------------------------|-----|----------|------------------------------------|--------|-------------------|-------------------------------|-------------------|------------------|
| <i>n</i>                                    | %   | <i>n</i> | %                                  |        |                   |                               |                   |                  |
| <i>TGFB1</i><br><i>rs1800469</i>            |     |          |                                    |        |                   |                               |                   |                  |
| genotype                                    |     |          |                                    |        |                   |                               |                   |                  |
| GG                                          | 65  | 37.14%   | 21                                 | 36.84% | 1.000             | AA+GA vs GG                   | 1.00              | 1.01 (0.55–1.88) |
| GA                                          | 89  | 50.86%   | 29                                 | 50.88% |                   | AA vs GA+GG                   | 1.00              | 1.03 (0.41–2.56) |
| AA                                          | 21  | 12.00%   | 7                                  | 12.28% |                   | AA vs GG                      | 1.00              | 1.03 (0.39–2.77) |
|                                             |     |          |                                    |        |                   | GA vs GG                      | 1.00              | 1.00 (0.53–1.93) |
|                                             |     |          |                                    |        |                   | AA vs GA                      | 1.00              | 1.02 (0.40–2.65) |
| Allele                                      |     |          |                                    |        |                   |                               |                   |                  |
| G                                           | 219 | 62.57%   | 71                                 | 62.28% |                   | A vs G                        | 1.00              | 1.01 (0.66–1.57) |
| A                                           | 131 | 37.43%   | 43                                 | 37.72% |                   |                               |                   |                  |
| <i>TGFB1</i><br><i>rs1800470</i>            |     |          |                                    |        |                   |                               |                   |                  |
| genotype                                    |     |          |                                    |        |                   |                               |                   |                  |
| GG                                          | 39  | 22.29%   | 9                                  | 15.79% | 0.538             | GG+GA vs AA                   | 1.00              | 1.05 (0.55–1.99) |
| GA                                          | 79  | 45.14%   | 30                                 | 52.63% |                   | GG vs GA+AA                   | 0.35              | 0.65 (0.30–1.45) |
| AA                                          | 57  | 32.57%   | 18                                 | 31.58% |                   | GG vs AA                      | 0.66              | 0.73 (0.30–1.79) |
|                                             |     |          |                                    |        |                   | GA vs AA                      | 0.61              | 1.20 (0.61–2.37) |
|                                             |     |          |                                    |        |                   | GG vs GA                      | 0.32              | 0.61 (0.26–1.41) |
| Allele                                      |     |          |                                    |        |                   |                               |                   |                  |
| G                                           | 157 | 44.86%   | 48                                 | 42.11% |                   | G vs A                        | 0.66              | 0.89 (0.58–1.37) |
| A                                           | 193 | 55.14%   | 66                                 | 57.89% |                   |                               |                   |                  |
| <i>TGFBR2</i><br><i>rs6785358</i>           |     |          |                                    |        |                   |                               |                   |                  |
| genotype                                    |     |          |                                    |        |                   |                               |                   |                  |
| AA                                          | 130 | 74.29%   | 43                                 | 75.44% | 0.470             | GG+AG vs AA                   | 1.00              | 0.94 (0.47–1.88) |
| AG                                          | 39  | 22.28%   | 14                                 | 24.56% |                   | GG vs AG+AA                   | 0.34              | -                |
| GG                                          | 6   | 3.43%    | 0                                  | 0.00%  |                   | GG vs AA                      | 0.34              | -                |
|                                             |     |          |                                    |        |                   | AG vs AA                      | 0.86              | 1.09 (0.54–2.19) |
|                                             |     |          |                                    |        |                   | GG vs AG                      | 0.32              | -                |
| Allele                                      |     |          |                                    |        |                   |                               |                   |                  |
| A                                           | 299 | 85.43%   | 100                                | 87.72% |                   | G vs A                        | 0.64              | 0.82 (0.44–1.55) |
| G                                           | 51  | 14.57%   | 14                                 | 12.28% |                   |                               |                   |                  |
| <i>TGFBR2</i><br><i>rs9838682</i>           |     |          |                                    |        |                   |                               |                   |                  |
| genotype                                    |     |          |                                    |        |                   |                               |                   |                  |
| AA                                          | 18  | 10.29%   | 6                                  | 10.52% | 0.951             | AA+AG vs GG                   | 0.76              | 1.11 (0.60–2.02) |
| AG                                          | 79  | 45.14%   | 27                                 | 47.37% |                   | AA vs AG+GG                   | 1.00              | 1.03 (0.39–2.73) |
| GG                                          | 78  | 44.57%   | 24                                 | 42.11% |                   | AA vs GG                      | 1.00              | 1.08 (0.39–3.04) |
|                                             |     |          |                                    |        |                   | AG vs GG                      | 0.75              | 1.11 (0.59–2.09) |
|                                             |     |          |                                    |        |                   | AA vs AG                      | 1.00              | 0.98 (0.35–2.71) |
| Allele                                      |     |          |                                    |        |                   |                               |                   |                  |
| A                                           | 115 | 32.86%   | 39                                 | 34.21% |                   | A vs G                        | 0.82              | 1.06 (0.68–1.66) |
| G                                           | 235 | 67.14%   | 75                                 | 65.79% |                   |                               |                   |                  |

^  $\chi^2$  test. \*Fisher's exact test

**Supplementary Table S4.** Distributions of the *TGFB1* rs1800469, rs1800470, *TGFBR2* rs6785358, rs9838682 genotypes and alleles in unstable angina patients with and without arterial hypertension (HA).

|                  | Without<br>Arterial<br>Hypertension ( <i>n</i> = 87) |        | Arterial<br>Hypertension<br>( <i>n</i> = 145) |        | <i>p</i> -value ^ | Compared<br>genotypes<br>or alleles | <i>p</i> -value * | OR (95% CI)       |
|------------------|------------------------------------------------------|--------|-----------------------------------------------|--------|-------------------|-------------------------------------|-------------------|-------------------|
|                  | <i>n</i>                                             | %      | <i>n</i>                                      | %      |                   |                                     |                   |                   |
|                  |                                                      |        |                                               |        |                   |                                     |                   |                   |
| <i>TGFB1</i>     |                                                      |        |                                               |        |                   |                                     |                   |                   |
| <i>rs1800469</i> |                                                      |        |                                               |        |                   |                                     |                   |                   |
| genotype         |                                                      |        |                                               |        |                   |                                     |                   |                   |
| GG               | 32                                                   | 36.78% | 54                                            | 37.24% | 0.981             | AA+GA vs GG                         | 1.00              | 0.98 (0.57–1.70)  |
| GA               | 44                                                   | 50.58% | 74                                            | 51.04% |                   | AA vs GA+GG                         | 0.84              | 0.92 (0.41–2.06)  |
| AA               | 11                                                   | 12.64% | 17                                            | 11.72% |                   | AA vs GG                            | 1.00              | 0.91 (0.38–2.20)  |
|                  |                                                      |        |                                               |        |                   | GA vs GG                            | 1.00              | 1.00 (0.56–1.77)  |
|                  |                                                      |        |                                               |        |                   | AA vs GA                            | 0.83              | 0.92 (0.40–2.14)  |
| Allele           |                                                      |        |                                               |        |                   |                                     |                   |                   |
| G                | 108                                                  | 62.07% | 182                                           | 62.76% |                   | A vs G                              | 0.92              | 0.97 (0.66–1.43)  |
| A                | 66                                                   | 37.93% | 108                                           | 37.24% |                   |                                     |                   |                   |
| <i>TGFB1</i>     |                                                      |        |                                               |        |                   |                                     |                   |                   |
| <i>rs1800470</i> |                                                      |        |                                               |        |                   |                                     |                   |                   |
| genotype         |                                                      |        |                                               |        |                   |                                     |                   |                   |
| GG               | 15                                                   | 17.24% | 33                                            | 22.76% | 0.622             | GG+GA vs AA                         | 0.89              | 1.08 (0.61–1.90)  |
| GA               | 43                                                   | 49.43% | 66                                            | 45.52% |                   | GG vs GA+AA                         | 0.40              | 1.41 (0.72–2.79)  |
| AA               | 29                                                   | 33.33% | 46                                            | 31.72% |                   | GG vs AA                            | 0.45              | 1.39 (0.64–2.99)  |
|                  |                                                      |        |                                               |        |                   | GA vs AA                            | 1.00              | 0.97 (0.53–1.77)  |
|                  |                                                      |        |                                               |        |                   | GG vs GA                            | 0.37              | 1.43 (0.70–2.95)  |
| Allele           |                                                      |        |                                               |        |                   |                                     |                   |                   |
| G                | 73                                                   | 41.95% | 132                                           | 45.52% |                   | G vs A                              | 0.50              | 1.16 (0.79–1.69)  |
| A                | 101                                                  | 58.05% | 158                                           | 54.48% |                   |                                     |                   |                   |
| <i>TGFBR2</i>    |                                                      |        |                                               |        |                   |                                     |                   |                   |
| <i>rs6785358</i> |                                                      |        |                                               |        |                   |                                     |                   |                   |
| genotype         |                                                      |        |                                               |        |                   |                                     |                   |                   |
| AA               | 65                                                   | 74.71% | 108                                           | 74.48% | 0.630             | GG+AG vs AA                         | 1.00              | 1.01 (0.55–1.87)  |
| AG               | 21                                                   | 24.14% | 32                                            | 22.07% |                   | GG vs AG+AA                         | 0.41              | 3.07 (0.35–26.73) |
| GG               | 1                                                    | 1.15%  | 5                                             | 3.45%  |                   | GG vs AA                            | 0.42              | 3.01 (0.34–26.33) |
|                  |                                                      |        |                                               |        |                   | AG vs AA                            | 0.87              | 0.92 (0.49–1.72)  |
|                  |                                                      |        |                                               |        |                   | GG vs AG                            | 0.40              | 3.28 (0.36–30.11) |
| Allele           |                                                      |        |                                               |        |                   |                                     |                   |                   |
| A                | 151                                                  | 86.78% | 248                                           | 85.52% |                   | G vs A                              | 0.78              | 1.11 (0.64–1.92)  |
| G                | 23                                                   | 13.22% | 42                                            | 14.48% |                   |                                     |                   |                   |
| <i>TGFBR2</i>    |                                                      |        |                                               |        |                   |                                     |                   |                   |
| <i>rs9838682</i> |                                                      |        |                                               |        |                   |                                     |                   |                   |
| genotype         |                                                      |        |                                               |        |                   |                                     |                   |                   |
| AA               | 6                                                    | 6.90%  | 18                                            | 12.41% | 0.311             | AA+AG vs GG                         | 0.79              | 0.91 (0.53–1.56)  |
| AG               | 44                                                   | 50.57% | 62                                            | 42.76% |                   | AA vs AG+GG                         | 0.27              | 1.91 (0.73–5.02)  |
| GG               | 37                                                   | 42.53% | 65                                            | 44.83% |                   | AA vs GG                            | 0.35              | 1.71 (0.62–4.68)  |
|                  |                                                      |        |                                               |        |                   | AG vs GG                            | 0.48              | 0.80 (0.46–1.40)  |
|                  |                                                      |        |                                               |        |                   | AA vs AG                            | 0.17              | 2.13 (0.78–5.80)  |
| Allele           |                                                      |        |                                               |        |                   |                                     |                   |                   |
| A                | 56                                                   | 32.18% | 98                                            | 33.79% |                   | A vs G                              | 0.76              | 1.08 (0.72–1.61)  |

|   |     |        |     |        |
|---|-----|--------|-----|--------|
| G | 118 | 67.82% | 192 | 66.21% |
|---|-----|--------|-----|--------|

---

^  $\chi^2$  test. \*Fisher's exact test.
